# Supplementary material for: Identification of control targets in Boolean molecular network models via computational algebra
Source: PubMed Central journal article supplement (PMC5035508; doi:10.1186/s12918-016-0332-x), 2016-09-23
Supplement: 12918_2016_332_MOESM1_ESM.pdf [file 12918_2016_332_MOESM1_ESM.pdf]

---

# Supporting material for: Identification of control targets in Boolean molecular network models via computational algebra

David Murrugarra<sup>1</sup>    Alan Veliz-Cuba<sup>2,3</sup>    Boris Aguilar<sup>4</sup>    Reinhard Laubenbacher<sup>5</sup>

<sup>1</sup>Department of Mathematics, University of Kentucky,  
Lexington, KY 40506-0027 USA.

<sup>2</sup>Department of Mathematics, University of Dayton,  
Dayton, OH 45469, USA.

<sup>4</sup>Institute for Systems Biology,  
Seattle, WA 98109-5263 USA.

<sup>5</sup>Center for Quantitative Medicine, University of Connecticut Health Center,  
Farmington, CT 06030-6033 USA.

## 1 A Method for Checking Reachability

In this section we describe an algebraic technique for checking the global reachability of a desired attractor using the controllers identified with the methods described in Section 3 of the paper. These methods are similar to those described in [2].

Consider  $\mathbf{x}_0, \mathbf{y}_0 \in \mathbb{K}^n$  as in Section 3 of the paper, that is,  $\mathbf{y}_0$  is the newly created desired attractor, and set the following ideal

$$I_{\mathbf{y}_0}^\mu = \langle f_1^\mu(x_1, \dots, x_m) - y_{01}, \dots, f_m^\mu(x_1, \dots, x_m) - y_{0n} \rangle \quad (1)$$

defined over the quotient ring  $\mathbb{F}_2[x_1, \dots, x_m]/J$ , where  $J = \langle x_1^2 - x_1, \dots, x_m^2 - x_m \rangle$ .

Notice that the variety  $V(I_{\mathbf{y}_0}^\mu)$  of the ideal  $I_{\mathbf{y}_0}^\mu$  represents all predecessor states of  $\mathbf{y}_0$ , that is, all the states  $\mathbf{x} \in \mathbb{K}^n$  such that  $\mathbf{F}_\mu(\mathbf{x}) = \mathbf{y}_0$ . Let  $\mathbf{F}_{\mu^r}(\mathbf{x}) = \mathbf{F}_\mu(\dots(\mathbf{F}_\mu(\mathbf{x})))$  ( $r$  times composition) and let  $f_j^{\mu^r}(x_1, \dots, x_m)$  be the  $j$ th-component function of  $\mathbf{F}_{\mu^r}(\mathbf{x})$ . Then define

$$I_{\mathbf{y}_0}^{\mu^r} = \langle f_1^{\mu^r}(x_1, \dots, x_m) - y_{01}, \dots, f_m^{\mu^r}(x_1, \dots, x_m) - y_{0n} \rangle \quad (2)$$

Similarly, the variety  $V(I_{\mathbf{y}_0}^{\mu^r})$  of the ideal  $I_{\mathbf{y}_0}^{\mu^r}$  represents all states that are  $r$ -steps away from  $\mathbf{y}_0$ , that is, all the states  $\mathbf{x} \in \mathbb{K}^n$  such that  $\mathbf{F}_{\mu^r}(\mathbf{x}) = \mathbf{y}_0$ .

**Proposition 1.1.** *Let  $\mathbf{x}_0, \mathbf{y}_0 \in \mathbb{K}^n$ . Then  $\mathbf{y}_0$  is reachable from  $\mathbf{x}_0$  if  $\mathbf{x}_0 \in V(I_{\mathbf{y}_0}^{\mu^r})$  for some  $r \geq 1$ .*

*Proof.* It follows from the definition of  $V(I_{\mathbf{y}_0}^{\mu^r})$ . □

Now consider the ideals

$$J_1 = I_{\mathbf{y}_0}^\mu \text{ and } J_r = I_{\mathbf{y}_0}^{\mu^r} J_{r-1}, \text{ for } r = 2, \dots, n. \quad (3)$$

Notice that the variety  $V(J_r)$  represents all the states that are at most  $r$ -steps ways from  $\mathbf{y}_0$ . It is easy to see that

$$J_1 \supset J_2 \supset \dots \supset J_r \supset J_{r+1} \supset \dots \quad (4)$$

Since  $\mathbb{K}^n$  is finite, the descending chain in Equation 4 stops at some index  $r = N$ . That is,

$$J_N = J_{N+1} = J_{N+2} = \dots \quad (5)$$

The following proposition uses equations 4-5 to establish a test for global reachability of the new attractor  $\mathbf{y}_0$ .

**Proposition 1.2.** Let  $\mathbf{y}_0 \in \mathbb{K}^n$ . Then  $\mathbf{y}_0$  is globally reachable if the chain in Equation 5 stops at the zero-ideal. That is,

$$J_N = J_{N+1} = \{0\}. \quad (6)$$

*Proof.* It follows from the fact that  $V(\{0\}) = \mathbb{K}^n$ . □

## 2 P53-mdm2 Network Polynomials

Consider the network at Figure 2 of the main text for the signaling pathway of *p53* that was published in [1]. This is a discrete dynamical system  $\mathbf{F} = (f_1, \dots, f_{16}) : \mathbb{F}_2^{16} \rightarrow \mathbb{F}_2^{16}$  with 16 nodes and binary states  $\mathbb{F}_2 = \{0, 1\}$ . Let us represent the nodes by

$$\begin{aligned} x_1 &= ATM, & x_2 &= p53, \\ x_3 &= Mdm2, & x_4 &= MdmX, \\ x_5 &= Wip1, & x_6 &= cyclinG, \\ x_7 &= PTEN, & x_8 &= p21, \\ x_9 &= AKT, & x_{10} &= cyclinE, \\ x_{11} &= Rb, & x_{12} &= E2F1, \\ x_{13} &= p14ARf, & x_{14} &= Bcl2, \\ x_{15} &= Bax, & x_{16} &= caspase. \end{aligned}$$

The polynomial functions for this network are given below. For the cancer cell model where *PTEN* and *p14ARf* are inactive (fixed to zero) and *cyclinG* is always active (fixed to 1) make the value of these variables equal to the corresponding constant.

$$\begin{aligned} f_1 &= 1+x_5+x_1*x_5+x_{12}*x_5+x_1*x_{12}*x_5+x_6+x_1*x_6+x_{12}*x_6+x_1*x_{12}*x_6+x_5*x_6, \\ f_2 &= 1+x_3+x_1*x_2*x_3+x_4+x_1*x_4+x_3*x_4+x_1*x_3*x_4+x_1*x_2*x_3*x_4, \\ f_3 &= 1+x_1+x_{10}+x_1*x_{10}+x_{11}+x_1*x_{11}+x_{10}*x_{11}+x_1*x_{10}*x_{11}+x_{13}+x_1*x_{13}+x_{10}*x_{13}+ \\ & x_1*x_{10}*x_{13}+x_{11}*x_{13}+x_1*x_{11}*x_{13}+x_{10}*x_{11}*x_{13}+x_1*x_{10}*x_{11}*x_{13}+x_1*x_2*x_3+x_{10}*x_2*x_3+ \\ & x_{11}*x_2*x_3+x_1*x_{10}*x_{11}*x_2*x_3+x_1*x_{13}*x_2*x_3+x_{10}*x_{13}*x_2*x_3+x_{11}*x_{13}*x_2*x_3+ \\ & x_1*x_{10}*x_{11}*x_{13}*x_2*x_3+x_1*x_4+x_{10}*x_4+x_{11}*x_4+x_1*x_{10}*x_{11}*x_4+x_1*x_{13}*x_4+x_{10}*x_{13}*x_4+ \\ & x_{11}*x_{13}*x_4+x_1*x_{10}*x_{11}*x_{13}*x_4+x_{13}*x_2*x_4+x_1*x_{13}*x_2*x_4+x_{10}*x_{13}*x_2*x_4+ \\ & x_1*x_{10}*x_{13}*x_2*x_4+x_{11}*x_{13}*x_2*x_4+x_{10}*x_{11}*x_{13}*x_2*x_4+ \\ & x_1*x_{10}*x_{11}*x_{13}*x_2*x_4+x_{13}*x_3*x_4+x_1*x_{13}*x_3*x_4+x_{10}*x_{13}*x_3*x_4+x_1*x_{10}*x_{13}*x_3*x_4+ \\ & x_{11}*x_{13}*x_3*x_4+x_1*x_{11}*x_{13}*x_3*x_4+x_{10}*x_{11}*x_{13}*x_3*x_4+x_1*x_{10}*x_{11}*x_{13}*x_3*x_4+ \\ & x_1*x_2*x_3*x_4+x_{10}*x_2*x_3*x_4+x_1*x_{10}*x_2*x_3*x_4+x_{11}*x_2*x_3*x_4+x_1*x_{11}*x_2*x_3*x_4+ \\ & x_{10}*x_{11}*x_2*x_3*x_4+x_{13}*x_2*x_3*x_4+x_1*x_{10}*x_{11}*x_{13}*x_2*x_3*x_4+x_1*x_5+x_{10}*x_5+ \\ & x_{11}*x_5+x_1*x_{10}*x_{11}*x_5+x_1*x_{13}*x_5+x_{10}*x_{13}*x_5+x_{11}*x_{13}*x_5+x_1*x_{10}*x_{11}*x_{13}*x_5+ \\ & x_{13}*x_2*x_5+x_1*x_{13}*x_2*x_5+x_{10}*x_{13}*x_2*x_5+x_1*x_{10}*x_{13}*x_2*x_5+x_{11}*x_{13}*x_2*x_5+ \\ & x_1*x_{11}*x_{13}*x_2*x_5+x_{10}*x_{11}*x_{13}*x_2*x_5+x_1*x_{10}*x_{11}*x_{13}*x_2*x_5+x_{13}*x_3*x_5+x_1*x_{13}*x_3*x_5+ \\ & x_{10}*x_{13}*x_3*x_5+x_1*x_{10}*x_{13}*x_3*x_5+x_{11}*x_{13}*x_3*x_5+x_1*x_{11}*x_{13}*x_3*x_5+x_{10}*x_{11}*x_{13}*x_3*x_5+ \\ & x_1*x_{10}*x_{11}*x_{13}*x_3*x_5+x_1*x_2*x_3*x_5+x_{10}*x_2*x_3*x_5+x_1*x_{10}*x_2*x_3*x_5+x_{11}*x_2*x_3*x_5+ \\ & x_1*x_{11}*x_2*x_3*x_5+x_{10}*x_{11}*x_2*x_3*x_5+x_{13}*x_2*x_3*x_5+x_1*x_{10}*x_{11}*x_{13}*x_2*x_3*x_5+x_1*x_4*x_5+ \\ & x_{10}*x_4*x_5+x_1*x_{10}*x_4*x_5+x_{11}*x_4*x_5+x_1*x_{11}*x_4*x_5+x_{10}*x_{11}*x_4*x_5+x_{13}*x_4*x_5+ \\ & x_1*x_{10}*x_{11}*x_{13}*x_4*x_5+x_1*x_{13}*x_2*x_4*x_5+x_{10}*x_{13}*x_2*x_4*x_5+x_{11}*x_{13}*x_2*x_4*x_5+ \\ & x_1*x_{10}*x_{11}*x_{13}*x_2*x_4*x_5+x_1*x_{13}*x_3*x_4*x_5+x_{10}*x_{13}*x_3*x_4*x_5+ \\ & x_{11}*x_{13}*x_3*x_4*x_5+x_1*x_{10}*x_{11}*x_{13}*x_3*x_4*x_5+x_1*x_2*x_3*x_4*x_5+x_{10}*x_2*x_3*x_4*x_5+ \\ & x_{11}*x_2*x_3*x_4*x_5+x_1*x_{10}*x_{11}*x_{13}*x_2*x_3*x_4*x_5+x_1*x_2*x_6+x_{10}*x_2*x_6+x_{11}*x_2*x_6+ \\ & x_1*x_{10}*x_{11}*x_2*x_6+x_1*x_{13}*x_2*x_6+x_{10}*x_{13}*x_2*x_6+x_{11}*x_{13}*x_2*x_6+x_1*x_{10}*x_{11}*x_{13}*x_2*x_6+ \\ & x_1*x_3*x_6+x_{10}*x_3*x_6+x_{11}*x_3*x_6+x_1*x_{10}*x_{11}*x_3*x_6+x_1*x_{13}*x_3*x_6+x_{10}*x_{13}*x_3*x_6+ \\ & x_{11}*x_{13}*x_3*x_6+x_1*x_{10}*x_{11}*x_{13}*x_3*x_6+x_{13}*x_2*x_3*x_6+x_1*x_{13}*x_2*x_3*x_6+ \\ & x_{10}*x_{13}*x_2*x_3*x_6+x_1*x_{10}*x_{13}*x_2*x_3*x_6+x_{11}*x_{13}*x_2*x_3*x_6+x_1*x_{11}*x_{13}*x_2*x_3*x_6+ \end{aligned}$$

$x_{10}x_{11}x_{13}x_2^2x_3^2x_6+x_{10}x_{10}x_{11}x_{13}x_2^2x_3^2x_6+x_{13}x_4^2x_6+x_{10}x_{13}x_4^2x_6+$   
 $x_{10}x_{13}x_4^2x_6+x_{10}x_{10}x_{13}x_4^2x_6+x_{11}x_{13}x_4^2x_6+$   
 $x_{10}x_{11}x_{13}x_4^2x_6+x_{10}x_{11}x_{13}x_4^2x_6+x_{10}x_{10}x_{11}x_{13}x_4^2x_6+x_{10}x_{10}x_{11}x_{13}x_4^2x_6+$   
 $x_{10}x_2^2x_4^2x_6+x_{10}x_{10}x_2^2x_4^2x_6+x_{11}x_2^2x_4^2x_6+x_{10}x_{11}x_2^2x_4^2x_6+x_{10}x_{11}x_2^2x_4^2x_6+$   
 $x_{13}x_2^2x_4^2x_6+x_{10}x_{10}x_{11}x_{13}x_2^2x_4^2x_6+x_{10}x_3^2x_4^2x_6+$   
 $x_{10}x_3^2x_4^2x_6+x_{10}x_{10}x_3^2x_4^2x_6+x_{11}x_3^2x_4^2x_6+x_{10}x_{11}x_3^2x_4^2x_6+x_{10}x_{11}x_3^2x_4^2x_6+$   
 $x_{13}x_3^2x_4^2x_6+x_{10}x_{10}x_{11}x_{13}x_3^2x_4^2x_6+x_{10}x_{13}x_2^2x_3^2x_4^2x_6+x_{10}x_{13}x_2^2x_3^2x_4^2x_6+$   
 $x_{10}x_{13}x_2^2x_3^2x_4^2x_6+x_{11}x_{13}x_2^2x_3^2x_4^2x_6+x_{10}x_{10}x_{11}x_{13}x_2^2x_3^2x_4^2x_6+x_{13}x_5^2x_6+$   
 $x_{10}x_{13}x_5^2x_6+x_{10}x_{13}x_5^2x_6+x_{10}x_{10}x_{13}x_5^2x_6+x_{11}x_{13}x_5^2x_6+x_{10}x_{11}x_{13}x_5^2x_6+$   
 $x_{10}x_{11}x_{13}x_5^2x_6+x_{10}x_{10}x_{11}x_{13}x_5^2x_6+x_{10}x_2^2x_5^2x_6+x_{10}x_2^2x_5^2x_6+x_{10}x_{10}x_2^2x_5^2x_6+$   
 $x_{11}x_2^2x_5^2x_6+x_{10}x_{11}x_2^2x_5^2x_6+x_{10}x_{11}x_2^2x_5^2x_6+x_{13}x_2^2x_5^2x_6+$   
 $x_{10}x_{10}x_{11}x_{13}x_2^2x_5^2x_6+x_{10}x_3^2x_5^2x_6+x_{10}x_3^2x_5^2x_6+x_{10}x_{10}x_3^2x_5^2x_6+$   
 $x_{11}x_3^2x_5^2x_6+x_{10}x_{11}x_3^2x_5^2x_6+x_{10}x_{11}x_3^2x_5^2x_6+x_{13}x_3^2x_5^2x_6+x_{10}x_{10}x_{11}x_{13}x_3^2x_5^2x_6+$   
 $x_{10}x_{13}x_2^2x_3^2x_5^2x_6+x_{10}x_{13}x_2^2x_3^2x_5^2x_6+x_{11}x_{13}x_2^2x_3^2x_5^2x_6+x_{10}x_{10}x_{11}x_{13}x_2^2x_3^2x_5^2x_6+$   
 $x_{10}x_{13}x_4^2x_5^2x_6+x_{10}x_{13}x_4^2x_5^2x_6+x_{11}x_{13}x_4^2x_5^2x_6+x_{10}x_{10}x_{11}x_{13}x_4^2x_5^2x_6+$   
 $x_{10}x_2^2x_4^2x_5^2x_6+x_{10}x_2^2x_4^2x_5^2x_6+x_{11}x_2^2x_4^2x_5^2x_6+$   
 $x_{10}x_{10}x_{11}x_{13}x_2^2x_4^2x_5^2x_6+x_{10}x_3^2x_4^2x_5^2x_6+x_{10}x_3^2x_4^2x_5^2x_6+x_{11}x_3^2x_4^2x_5^2x_6+$   
 $x_{10}x_{10}x_{11}x_{13}x_3^2x_4^2x_5^2x_6+x_{13}x_2^2x_3^2x_4^2x_5^2x_6+x_{10}x_{10}x_{11}x_{13}x_2^2x_3^2x_4^2x_5^2x_6+$   
 $x_{10}x_2^2x_9+x_{10}x_2^2x_9+x_{11}x_2^2x_9+x_{10}x_{10}x_{11}x_2^2x_9+x_{10}x_{13}x_2^2x_9+$   
 $x_{10}x_{13}x_2^2x_9+x_{11}x_{13}x_2^2x_9+x_{10}x_{10}x_{11}x_{13}x_2^2x_9+x_{10}x_3^2x_9+x_{10}x_3^2x_9+x_{11}x_3^2x_9+$   
 $x_{10}x_{10}x_{11}x_3^2x_9+x_{10}x_{13}x_3^2x_9+x_{10}x_{13}x_3^2x_9+x_{11}x_{13}x_3^2x_9+$   
 $x_{10}x_{10}x_{11}x_{13}x_3^2x_9+x_{13}x_2^2x_3^2x_9+x_{10}x_{13}x_2^2x_3^2x_9+x_{10}x_{13}x_2^2x_3^2x_9+$   
 $x_{10}x_{10}x_{13}x_2^2x_3^2x_9+x_{11}x_{13}x_2^2x_3^2x_9+$   
 $x_{10}x_{11}x_{13}x_2^2x_3^2x_9+x_{10}x_{11}x_{13}x_2^2x_3^2x_9+$   
 $x_{10}x_{10}x_{11}x_{13}x_2^2x_3^2x_9+x_{13}x_4^2x_9+x_{10}x_{13}x_4^2x_9+x_{10}x_{13}x_4^2x_9+$   
 $x_{10}x_{10}x_{13}x_4^2x_9+x_{11}x_{13}x_4^2x_9+$   
 $x_{10}x_{11}x_{13}x_4^2x_9+x_{10}x_{11}x_{13}x_4^2x_9+x_{10}x_{10}x_{11}x_{13}x_4^2x_9+x_{10}x_2^2x_4^2x_9+x_{10}x_2^2x_4^2x_9+$   
 $x_{10}x_{10}x_2^2x_4^2x_9+x_{11}x_2^2x_4^2x_9+x_{10}x_{11}x_2^2x_4^2x_9+x_{10}x_{11}x_2^2x_4^2x_9+x_{13}x_2^2x_4^2x_9+$   
 $x_{10}x_{10}x_{11}x_{13}x_2^2x_4^2x_9+x_{10}x_3^2x_4^2x_9+x_{10}x_3^2x_4^2x_9+x_{10}x_{10}x_3^2x_4^2x_9+x_{11}x_3^2x_4^2x_9+$   
 $x_{10}x_{11}x_3^2x_4^2x_9+x_{10}x_{11}x_3^2x_4^2x_9+x_{13}x_3^2x_4^2x_9+x_{10}x_{10}x_{11}x_{13}x_3^2x_4^2x_9+$   
 $x_{10}x_{13}x_2^2x_3^2x_4^2x_9+x_{10}x_{13}x_2^2x_3^2x_4^2x_9+x_{11}x_{13}x_2^2x_3^2x_4^2x_9+$   
 $x_{10}x_{10}x_{11}x_{13}x_2^2x_3^2x_4^2x_9+x_{13}x_5^2x_9+x_{10}x_{13}x_5^2x_9+x_{10}x_{13}x_5^2x_9+x_{10}x_{10}x_{13}x_5^2x_9+$   
 $x_{11}x_{13}x_5^2x_9+x_{10}x_{11}x_{13}x_5^2x_9+x_{10}x_{11}x_{13}x_5^2x_9+x_{10}x_{10}x_{11}x_{13}x_5^2x_9+x_{10}x_2^2x_5^2x_9+$   
 $x_{10}x_2^2x_5^2x_9+x_{10}x_{10}x_2^2x_5^2x_9+x_{11}x_2^2x_5^2x_9+x_{10}x_{11}x_2^2x_5^2x_9+x_{10}x_{11}x_2^2x_5^2x_9+$   
 $x_{13}x_2^2x_5^2x_9+x_{10}x_{10}x_{11}x_{13}x_2^2x_5^2x_9+x_{10}x_3^2x_5^2x_9+x_{10}x_3^2x_5^2x_9+x_{10}x_{10}x_3^2x_5^2x_9+$   
 $x_{11}x_3^2x_5^2x_9+x_{10}x_{11}x_3^2x_5^2x_9+x_{10}x_{11}x_3^2x_5^2x_9+x_{13}x_3^2x_5^2x_9+$   
 $x_{10}x_{10}x_{11}x_{13}x_3^2x_5^2x_9+x_{10}x_{13}x_2^2x_3^2x_5^2x_9+x_{10}x_{13}x_2^2x_3^2x_5^2x_9+$   
 $x_{11}x_{13}x_2^2x_3^2x_5^2x_9+x_{10}x_{10}x_{11}x_{13}x_2^2x_3^2x_5^2x_9+x_{10}x_{13}x_4^2x_5^2x_9+$   
 $x_{11}x_{13}x_4^2x_5^2x_9+x_{10}x_{10}x_{11}x_{13}x_4^2x_5^2x_9+x_{10}x_2^2x_4^2x_5^2x_9+x_{10}x_2^2x_4^2x_5^2x_9+$   
 $x_{11}x_2^2x_4^2x_5^2x_9+x_{10}x_{10}x_{11}x_{13}x_2^2x_4^2x_5^2x_9+x_{10}x_3^2x_4^2x_5^2x_9+x_{10}x_3^2x_4^2x_5^2x_9+$   
 $x_{11}x_3^2x_4^2x_5^2x_9+x_{10}x_{10}x_{11}x_{13}x_3^2x_4^2x_5^2x_9+x_{13}x_2^2x_3^2x_4^2x_5^2x_9+$   
 $x_{10}x_{10}x_{11}x_{13}x_2^2x_3^2x_4^2x_5^2x_9+x_{10}x_6^2x_9+x_{10}x_6^2x_9+x_{11}x_6^2x_9+x_{10}x_{10}x_{11}x_6^2x_9+$   
 $x_{10}x_{13}x_6^2x_9+x_{10}x_{13}x_6^2x_9+x_{11}x_{13}x_6^2x_9+x_{10}x_{10}x_{11}x_{13}x_6^2x_9+x_{13}x_2^2x_6^2x_9+$   
 $x_{10}x_{13}x_2^2x_6^2x_9+x_{10}x_{13}x_2^2x_6^2x_9+x_{10}x_{10}x_{13}x_2^2x_6^2x_9+x_{11}x_{13}x_2^2x_6^2x_9+$   
 $x_{10}x_{11}x_{13}x_2^2x_6^2x_9+x_{10}x_{11}x_{13}x_2^2x_6^2x_9+x_{10}x_{10}x_{11}x_{13}x_2^2x_6^2x_9+x_{13}x_3^2x_6^2x_9+$   
 $x_{10}x_{13}x_3^2x_6^2x_9+x_{10}x_{13}x_3^2x_6^2x_9+x_{10}x_{10}x_{13}x_3^2x_6^2x_9+x_{11}x_{13}x_3^2x_6^2x_9+$   
 $x_{10}x_{11}x_{13}x_3^2x_6^2x_9+x_{10}x_{11}x_{13}x_3^2x_6^2x_9+x_{10}x_{10}x_{11}x_{13}x_3^2x_6^2x_9+$   
 $x_{10}x_2^2x_3^2x_6^2x_9+x_{10}x_2^2x_3^2x_6^2x_9+x_{10}x_{10}x_2^2x_3^2x_6^2x_9+x_{11}x_2^2x_3^2x_6^2x_9+$   
 $x_{10}x_{11}x_2^2x_3^2x_6^2x_9+x_{10}x_{11}x_2^2x_3^2x_6^2x_9+x_{13}x_2^2x_3^2x_6^2x_9+x_{10}x_{10}x_{11}x_{13}x_2^2x_3^2x_6^2x_9+$   
 $x_{10}x_4^2x_6^2x_9+x_{10}x_4^2x_6^2x_9+x_{10}x_{10}x_4^2x_6^2x_9+x_{11}x_4^2x_6^2x_9+x_{10}x_{11}x_4^2x_6^2x_9+$

$$\begin{aligned}
& x_{10}x_{11}x_4x_6x_9+x_{13}x_4x_6x_9+x_1x_{10}x_{11}x_{13}x_4x_6x_9+x_1x_{13}x_2x_4x_6x_9+ \\
& x_{10}x_{13}x_2x_4x_6x_9+x_{11}x_{13}x_2x_4x_6x_9+x_1x_{10}x_{11}x_{13}x_2x_4x_6x_9+ \\
& x_1x_{13}x_3x_4x_6x_9+x_{10}x_{13}x_3x_4x_6x_9+x_{11}x_{13}x_3x_4x_6x_9+ \\
& x_1x_{10}x_{11}x_{13}x_3x_4x_6x_9+x_1x_2x_3x_4x_6x_9+x_{10}x_2x_3x_4x_6x_9+ \\
& x_{11}x_2x_3x_4x_6x_9+x_1x_{10}x_{11}x_{13}x_2x_3x_4x_6x_9+ \\
& x_1x_5x_6x_9+x_{10}x_5x_6x_9+x_1x_{10}x_5x_6x_9+x_{11}x_5x_6x_9+x_1x_{11}x_5x_6x_9+ \\
& x_{10}x_{11}x_5x_6x_9+x_{13}x_5x_6x_9+x_1x_{10}x_{11}x_{13}x_5x_6x_9+x_1x_{13}x_2x_5x_6x_9+ \\
& x_{10}x_{13}x_2x_5x_6x_9+x_{11}x_{13}x_2x_5x_6x_9+x_1x_{10}x_{11}x_{13}x_2x_5x_6x_9+ \\
& x_1x_{13}x_3x_5x_6x_9+x_{10}x_{13}x_3x_5x_6x_9+x_{11}x_{13}x_3x_5x_6x_9+ \\
& x_1x_{10}x_{11}x_{13}x_3x_5x_6x_9+x_1x_2x_3x_5x_6x_9+x_{10}x_2x_3x_5x_6x_9+ \\
& x_{11}x_2x_3x_5x_6x_9+x_1x_{10}x_{11}x_{13}x_2x_3x_5x_6x_9+x_1x_4x_5x_6x_9+ \\
& x_{10}x_4x_5x_6x_9+x_{11}x_4x_5x_6x_9+x_1x_{10}x_{11}x_{13}x_4x_5x_6x_9+ \\
& x_{13}x_2x_4x_5x_6x_9+x_1x_{10}x_{11}x_{13}x_2x_4x_5x_6x_9+x_{13}x_3x_4x_5x_6x_9+ \\
& x_1x_{10}x_{11}x_{13}x_3x_4x_5x_6x_9+x_1x_2x_3x_4x_5x_6x_9+x_{10}x_2x_3x_4x_5x_6x_9+ \\
& x_1x_{10}x_2x_3x_4x_5x_6x_9+x_{11}x_2x_3x_4x_5x_6x_9+x_1x_{11}x_2x_3x_4x_5x_6x_9+ \\
& x_{10}x_{11}x_2x_3x_4x_5x_6x_9+x_1x_{10}x_{11}x_2x_3x_4x_5x_6x_9+x_{13}x_2x_3x_4x_5x_6x_9+ \\
& x_1x_{13}x_2x_3x_4x_5x_6x_9+x_{10}x_{13}x_2x_3x_4x_5x_6x_9+ \\
& x_1x_{10}x_{13}x_2x_3x_4x_5x_6x_9+x_{11}x_{13}x_2x_3x_4x_5x_6x_9+ \\
& x_1x_{11}x_{13}x_2x_3x_4x_5x_6x_9+x_{10}x_{11}x_{13}x_2x_3x_4x_5x_6x_9, \\
f_4 = & 1+x_1+x_{13}+x_1x_{13}+x_3+x_1x_3+x_{13}x_3+x_1x_{13}x_3+x_1x_4x_5+x_1x_{13}x_4x_5+ \\
& x_1x_3x_4x_5+x_1x_{13}x_3x_4x_5+x_1x_9+x_1x_{13}x_9+x_1x_3x_9+x_1x_{13}x_3x_9+ \\
& x_{13}x_4x_9+x_1x_{13}x_4x_9+x_{13}x_3x_4x_9+x_1x_{13}x_3x_4x_9+x_{13}x_5x_9+ \\
& x_1x_{13}x_5x_9+x_{13}x_3x_5x_9+x_1x_{13}x_3x_5x_9+x_1x_4x_5x_9+ \\
& x_{13}x_4x_5x_9+x_3x_4x_5x_9+x_1x_{13}x_3x_4x_5x_9, \\
f_5 = & x_2, \\
f_6 = & x_2, \\
f_7 = & x_2, \\
f_8 = & x_2 + x_2x_3x_9 + x_2x_3x_8x_9, \\
f_9 = & 1+x_7, \\
f_{10} = & 1+x_8, \\
f_{11} = & x_1+x_{11}+x_1x_{11}+x_{10}x_{11}+x_1x_{10}x_{11}+x_1x_{16}+x_{11}x_{16}+x_1x_{11}x_{16}+x_{10}x_{11}x_{16}+ \\
& x_1x_{10}x_{11}x_{16}+x_1x_{10}x_3+x_{11}x_3+x_1x_{11}x_3+x_{10}x_{11}x_3+x_1x_{10}x_{16}x_3+x_{11}x_{16}x_3+ \\
& x_1x_{11}x_{16}x_3+x_{10}x_{11}x_{16}x_3, \\
f_{12} = & 1+x_{11}+x_1x_{11}+x_{11}x_{12}+x_1x_{11}x_{12}+x_{13}+x_{11}x_{13}+x_1x_{11}x_{13}+x_{11}x_{12}x_{13}+ \\
& x_1x_{11}x_{12}x_{13}+x_{11}x_3+x_1x_{11}x_3+x_{11}x_{12}x_3+x_1x_{11}x_{12}x_3+x_{11}x_{13}x_3+ \\
& x_1x_{11}x_{13}x_3+x_1x_{12}x_{13}x_3+x_{11}x_{12}x_{13}x_3, \\
f_{13} = & x_{12}+x_{13}+x_{12}x_{13}+x_{12}x_2+x_{13}x_2+x_{12}x_{13}x_2+x_{12}x_5+x_{13}x_5+ \\
& x_{12}x_2x_5+x_{13}x_2x_5, \\
f_{14} = & x_{14}+x_{14}x_{16}+x_{14}x_2+x_{14}x_{16}x_2+x_9+x_{14}x_9+x_{14}x_{16}x_9+x_2x_9, \\
f_{15} = & x_2 + x_{14}x_2 + x_{14}x_{15}x_2, \\
f_{16} = & x_{15}+x_{12}x_{16}+x_{12}x_{14}x_{16}+x_{12}x_{15}x_{16}+x_{12}x_{14}x_{15}x_{16}+x_{14}x_{15}x_8+ \\
& x_{12}x_{14}x_{15}x_8+x_{12}x_{16}x_8+x_{12}x_{14}x_{16}x_8+x_{12}x_{15}x_{16}x_8+ \\
& x_{14}x_{15}x_{16}x_8+x_{14}x_{15}x_9+x_{12}x_{14}x_{15}x_9+x_{12}x_{16}x_9+ \\
& x_{12}x_{14}x_{16}x_9+x_{12}x_{15}x_{16}x_9+x_{14}x_{15}x_{16}x_9+ \\
& x_{15}x_8x_9+x_{12}x_{15}x_8x_9+x_{12}x_{14}x_{15}x_8x_9+x_{12}x_{16}x_8x_9+ \\
& x_{12}x_{14}x_{16}x_8x_9+x_{15}x_{16}x_8x_9+x_{14}x_{15}x_{16}x_8x_9+x_{12}x_{14}x_{15}x_{16}x_8x_9.
\end{aligned}$$

### 3 P53-mdm2 network control combinations

Here we list the top 10 controllers for the cancer cell model where *PTEN* and *p14ARf* are inactive (fixed to zero) and *cyclinG* is always active (fixed to 1), see Table 5 of [1].

The 10 control sets that give the largest basin for  $\mathbf{y}_0$  are given in Table 1 and the 10 control sets that give the smallest basin for  $\mathbf{y}_0$  are in Table 2. For each solution, the edges that are crossed-out (in red) are edges that become nonessential after the other controllers in the set have been applied.

| Sets | Controllers                                                                                                                                                            | Basin % |
|------|------------------------------------------------------------------------------------------------------------------------------------------------------------------------|---------|
| 1    | $p53 \rightarrow Wip1, Mdm2 \rightarrow p21, Mdm2 \rightarrow p53, p21 \rightarrow Caspase.$                                                                           | 60.815  |
| 2    | $p53 \rightarrow Wip1, Mdm2 \rightarrow p21, \del{p53 \rightarrow p53}, Mdm2 \rightarrow p53, p21 \rightarrow Caspase.$                                                | 60.815  |
| 3    | $p53 \rightarrow Wip1, \del{p21 \rightarrow p21}, Mdm2 \rightarrow p21, Mdm2 \rightarrow p53, p21 \rightarrow Caspase.$                                                | 60.815  |
| 4    | $p53 \rightarrow Wip1, \del{p21 \rightarrow p21}, Mdm2 \rightarrow p21, \del{p53 \rightarrow p53}, Mdm2 \rightarrow p53, p21 \rightarrow Caspase.$                     | 60.815  |
| 5    | $p53 \rightarrow Wip1, ATM \rightarrow Rb, Mdm2 \rightarrow p21, Mdm2 \rightarrow p53, p21 \rightarrow Caspase.$                                                       | 60.815  |
| 6    | $p53 \rightarrow Wip1, ATM \rightarrow Rb, Mdm2 \rightarrow p21, \del{p53 \rightarrow p53}, Mdm2 \rightarrow p53, p21 \rightarrow Caspase, p21 \rightarrow Caspase.$   | 60.815  |
| 7    | $p53 \rightarrow Wip1, ATM \rightarrow Rb, \del{p21 \rightarrow p21}, Mdm2 \rightarrow p21, Mdm2 \rightarrow p53, p21 \rightarrow Caspase.$                            | 60.815  |
| 8    | $p53 \rightarrow Wip1, ATM \rightarrow Rb, \del{p21 \rightarrow p21}, Mdm2 \rightarrow p21, \del{p53 \rightarrow p53}, Mdm2 \rightarrow p53, p21 \rightarrow Caspase.$ | 60.815  |
| 9    | $p53 \rightarrow Wip1, Caspase \rightarrow Rb, ATM \rightarrow Rb, Mdm2 \rightarrow p21, Mdm2 \rightarrow p53, p21 \rightarrow Caspase.$                               | 60.815  |
| 10   | $p53 \rightarrow Wip1, Caspase \rightarrow Rb, ATM \rightarrow Rb, Mdm2 \rightarrow p21, \del{p53 \rightarrow p53}, Mdm2 \rightarrow p53, p21 \rightarrow Caspase.$    | 60.815  |

Table 1: Control sets that give the largest basin for  $\mathbf{y}_0$ .

| Sets | Controllers                                                                                                                                                                                     | Basin % |
|------|-------------------------------------------------------------------------------------------------------------------------------------------------------------------------------------------------|---------|
| 936  | $p53 \rightarrow Wip1, Mdm2 \rightarrow p21, ATM \rightarrow ATM, E2F1 \rightarrow Caspase.$                                                                                                    | 0.42725 |
| 937  | $p53 \rightarrow Wip1, \del{p21 \rightarrow p21}, Mdm2 \rightarrow p21, ATM \rightarrow ATM, E2F1 \rightarrow Caspase.$                                                                         | 0.42725 |
| 938  | $p53 \rightarrow Wip1, ATM \rightarrow Rb, Mdm2 \rightarrow p53, \del{ATM \rightarrow p53}, E2F1 \rightarrow ATM, E2F1 \rightarrow Caspase.$                                                    | 0.41504 |
| 939  | $p53 \rightarrow Wip1, ATM \rightarrow Rb, \del{p53 \rightarrow p53}, Mdm2 \rightarrow p53, \del{ATM \rightarrow p53}, E2F1 \rightarrow ATM, E2F1 \rightarrow Caspase.$                         | 0.41504 |
| 940  | $p53 \rightarrow Wip1, Caspase \rightarrow Rb, ATM \rightarrow Rb, ATM \rightarrow ATM, E2F1 \rightarrow Caspase.$                                                                              | 0.41504 |
| 941  | $p53 \rightarrow Wip1, Caspase \rightarrow Rb, ATM \rightarrow Rb, Mdm2 \rightarrow p53, \del{ATM \rightarrow p53}, E2F1 \rightarrow ATM, E2F1 \rightarrow Caspase.$                            | 0.41504 |
| 942  | $p53 \rightarrow Wip1, Caspase \rightarrow Rb, ATM \rightarrow Rb, \del{p53 \rightarrow p53}, Mdm2 \rightarrow p53, \del{ATM \rightarrow p53}, E2F1 \rightarrow ATM, E2F1 \rightarrow Caspase.$ | 0.41504 |
| 943  | $p53 \rightarrow Wip1, ATM \rightarrow ATM, E2F1 \rightarrow Caspase,$                                                                                                                          | 0.3418  |
| 944  | $p53 \rightarrow Wip1, Mdm2 \rightarrow p53, \del{ATM \rightarrow p53}, E2F1 \rightarrow ATM, E2F1 \rightarrow Caspase,$                                                                        | 0.31738 |
| 945  | $p53 \rightarrow Wip1, \del{p53 \rightarrow p53}, Mdm2 \rightarrow p53, \del{ATM \rightarrow p53}, E2F1 \rightarrow ATM, E2F1 \rightarrow Caspase.$                                             | 0.31738 |

Table 2: Control sets that give the smallest basin for  $\mathbf{y}_0$ .

## 4 T-LGL network

Here we show details of the computation of the control targets shown in Eq. 13 (main text) and Table 2 (main text).

First, we consider the polynomials  $g_i := (u_i^- + u_i^+ + 1)f_i(x) + u_i^+ - x_i$ . We are interested in the solutions of the system of 18 equations  $g_1 = 0, \dots, g_{16} = 0, x_{16} = 0, x_{10} = 0$ . Since the combination of node deletion and constant expression of the same node is not biologically relevant, we require that at least one of the control parameters  $u_i^+, u_i^-$  is zero; that is, we require  $u_i^- u_i^+ = 0$ . The algebraic representation of the solutions is then encoded as the ideal of polynomials  $I = \langle g_1, g_2, \dots, g_{16}, x_{16}, x_{10}, u_1^- u_1^+, u_2^- u_2^+, \dots, u_{16}^- u_{16}^+ \rangle$ .

Using the algebra software Macaulay2, we find that the Gröbner basis in lexicographical order of this ideal is

$$G = \{ u_{10}^+, u_{16}^+, (u_{10}^- + 1)u_9^+, (u_{10}^- + 1)(u_9^- + 1)u_8^+, (u_{10}^- + 1)(u_{13}^+ + 1)u_{12}^+, u_{15}^-(u_{10}^- + 1)(u_9^- + 1)(u_8^- + 1)(u_6^- + 1)(u_7^+ + 1), u_{11}^-(u_{10}^- + 1)(u_9^- + 1)u_7^-(u_6^- + 1), u_{14}^-(u_{12}^- + 1)(u_{10}^- + 1)(u_{13}^+ + 1), u_{13}^-(u_{10}^- + 1)u_{12}^+, u_{15}^- u_{11}^-(u_{10}^- + 1)(u_9^- + 1)(u_6^- + 1)(u_7^+ + 1), u_{15}^-(u_{10}^- + 1)(u_9^- + 1)(u_8^- + 1)u_7^-(u_6^- + 1), u_{15}^-(u_{10}^- + 1)(u_9^- + 1)(u_8^- + 1)u_6^+, u_{14}^- u_{13}^-(u_{12}^- + 1)(u_{10}^- + 1), u_{11}^-(u_{10}^- + 1)(u_9^- + 1)u_6^+, \dots \}$$

The polynomials not shown in the list above consist of polynomials that contain variables  $x_i$ 's, or polynomials of the form  $u_i^+ u_i^-$ , which give no new information. We make two important remarks. First, the list of polynomials in  $G$  encode the same solutions as the ideal  $I$ . Thus, if we can choose parameters such that the system of equations defined by  $G$  has no solution, then the original system will have no solutions. Second, the polynomials shown above depend only on the control parameters. Thus, for appropriate choices of  $u_i^+$  and  $u_i^-$ , we can make one of such polynomials equal to 1 (e.g. for  $u_{10}^+ = 1$ ), which guarantees that the original system has no solutions regardless of the value of the variables  $x$ .

Then, the control policies that we obtain are the following:

1.  $u_{16}^+ = 1$ , no restriction on other controls
2.  $u_{10}^+ = 1$ , no restriction on other controls
3.  $u_{10}^- = 0, u_9^+ = 1$ , no restriction on other controls
4.  $u_{10}^- = 0, u_9^- = 0, u_8^+ = 1$ , no restriction on other controls
5.  $u_{10}^- = 0, u_{13}^+ = 0, u_{12}^+ = 1$ , no restriction on other controls
6.  $u_{15}^- = 1, u_{10}^- = 0, u_9^- = 0, u_8^- = 0, u_6^- = 0, u_7^+ = 0$ , no restriction on other controls
7.  $u_{14}^- = 1, u_{12}^- = 0, u_{10}^- = 0, u_{13}^+ = 0$ , no restriction on other controls
8.  $u_{11}^- = 1, u_{10}^- = 0, u_9^- = 0, u_6^+ = 1$ , no restriction on other controls
9.  $u_{11}^- = 1, u_{10}^- = 0, u_9^- = 0, u_7^- = 1, u_6^- = 0$ , no restriction on other controls
10.  $u_{13}^- = 1, u_{10}^- = 0, u_{12}^+ = 1$ , no restriction on other controls
11.  $u_{15}^- = 1, u_{11}^- = 1, u_{10}^- = 0, u_9^- = 0, u_6^- = 0, u_7^+ = 0$ , no restriction on other controls
12.  $u_{15}^- = 1, u_{10}^- = 0, u_9^- = 0, u_8^- = 0, u_7^- = 1, u_6^- = 0$ , no restriction on other controls
13.  $u_{15}^- = 1, u_{10}^- = 0, u_9^- = 0, u_8^- = 0, u_6^+ = 1$ , no restriction on other controls
14.  $u_{14}^- = 1, u_{13}^- = 1, u_{12}^- = 0, u_{10}^- = 0$ , no restriction on other controls

Note that some control policies are better than others. For example, control policy 5 needs only one active control ( $u_{12}^+ = 1$ , all the others can be zero), but control policy 10 requires 2 active controls ( $u_{12}^+ = 1$  and  $u_{13}^- = 1$ ). By inspection, we see that the best control policies are the following:

1.  $u_{16}^+ = 1$ , all other controls equal to zero

2.  $u_{10}^+ = 1$ , all other controls equal to zero
3.  $u_9^+ = 1$ , all other controls equal to zero
4.  $u_8^+ = 1$ , all other controls equal to zero
5.  $u_{12}^+ = 1$ , all other controls equal to zero
6.  $u_{15}^- = 1$ , all other controls equal to zero
7.  $u_{14}^- = 1$ , all other controls equal to zero
8.  $u_{11}^- = 1, u_6^+ = 1$ , all other controls equal to zero
9.  $u_{11}^- = 1, u_7^- = 1$ , all other controls equal to zero

These are the controls reported in Table 2 (main text). Note that control  $u_{16}^+ = 1$  corresponds to the constant expression of the conceptual node  $x_{16} = \text{Apoptosis}$ , so it is not explicitly reported.

## References

- [1] M. CHOI, J. SHI, S. H. JUNG, X. CHEN, AND K.-H. CHO, *Attractor landscape analysis reveals feedback loops in the p53 network that control the cellular response to dna damage*, *Sci. Signal.*, 5 (2012), p. ra83.
- [2] R. LI, M. YANG, AND T. CHU, *Controllability and observability of boolean networks arising from biology*, *Chaos*, 25 (2015), p. 023104.
